# Supplementary figures and images for: Preparation of highly dispersed RhPt alloy catalysts in mesoporous silica using supercritical carbon dioxide and selective synthesis of ethane in butane hydrogenolysisElectronic supplementary information (ESI) available: Figs. S1 and S2, Schemes S1 and S2. See http://www.rsc.org/suppdata/cc/b2/b211680d/
Source: Royal Society of Chemistry journal article supplement (doi:10.1039/b211680d), 2003-01-30

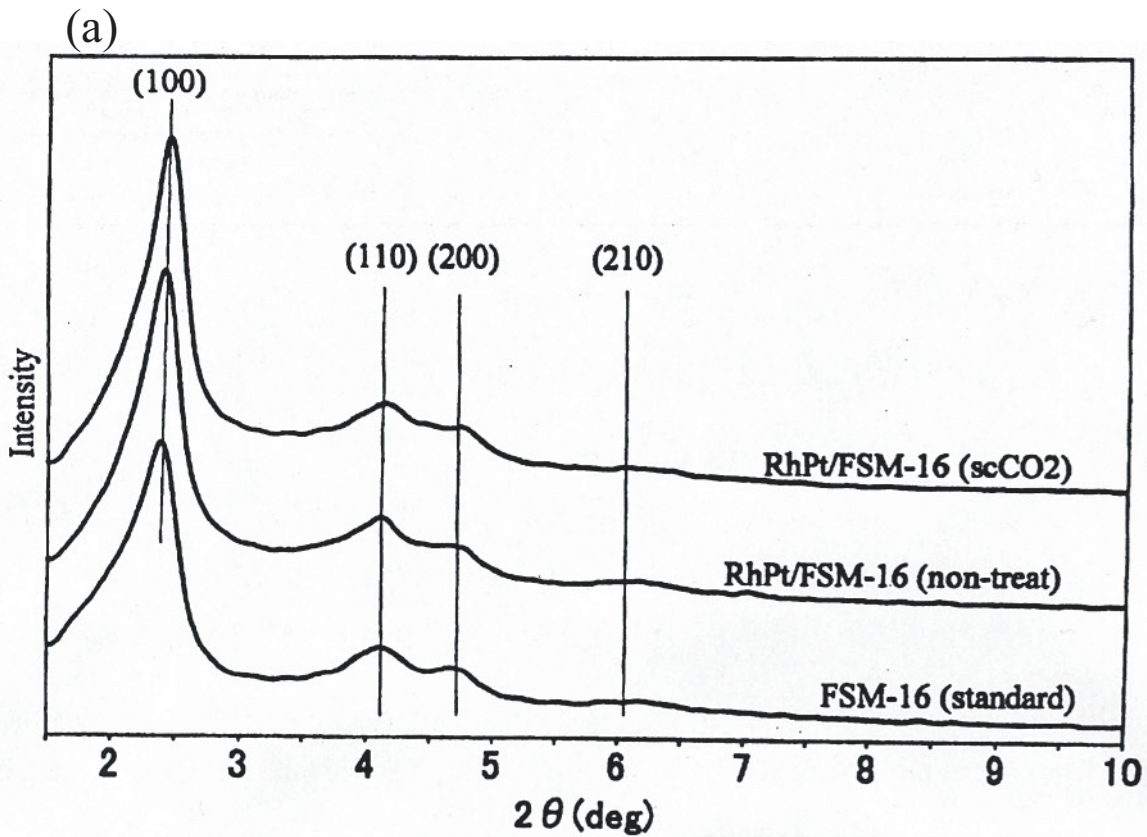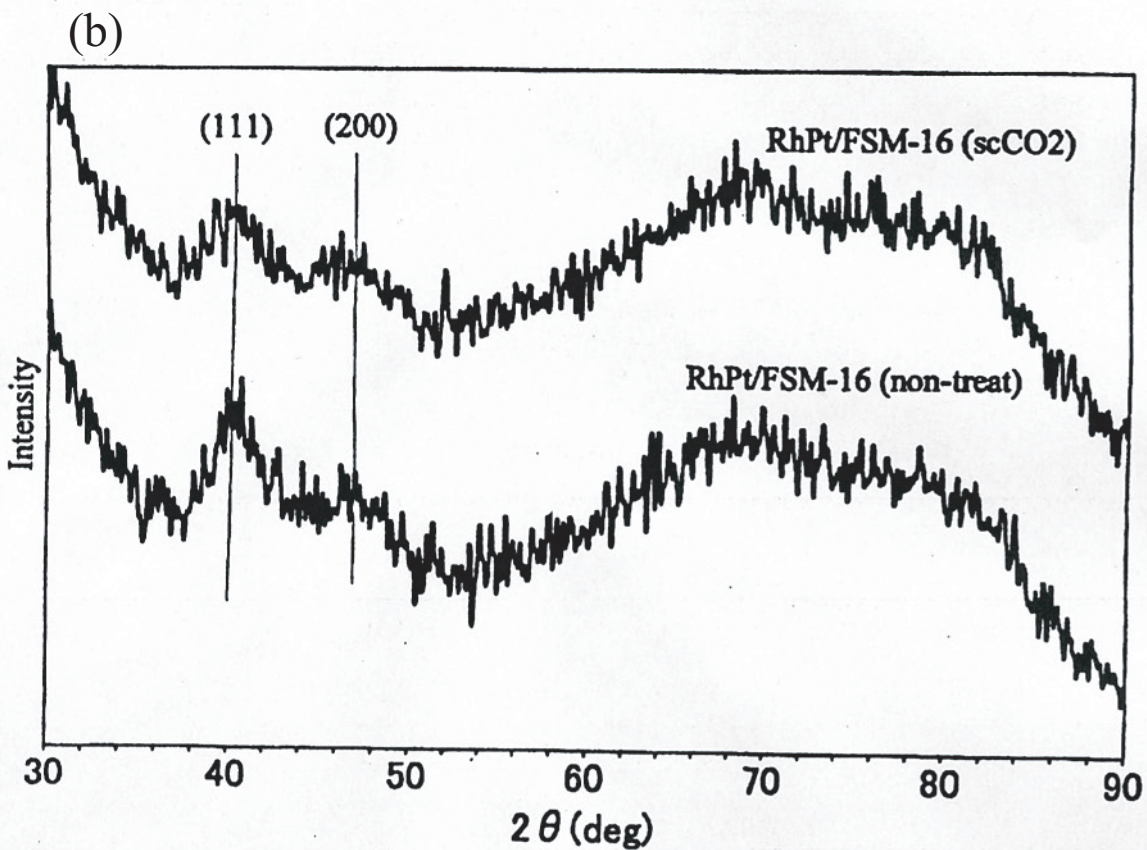

Figure 1s. XRD patterns for RhPt/FSM-16 catalysts: (a) low angle region  
(b) high angle region

Supplement: figs1.pdf [file figs1.pdf]

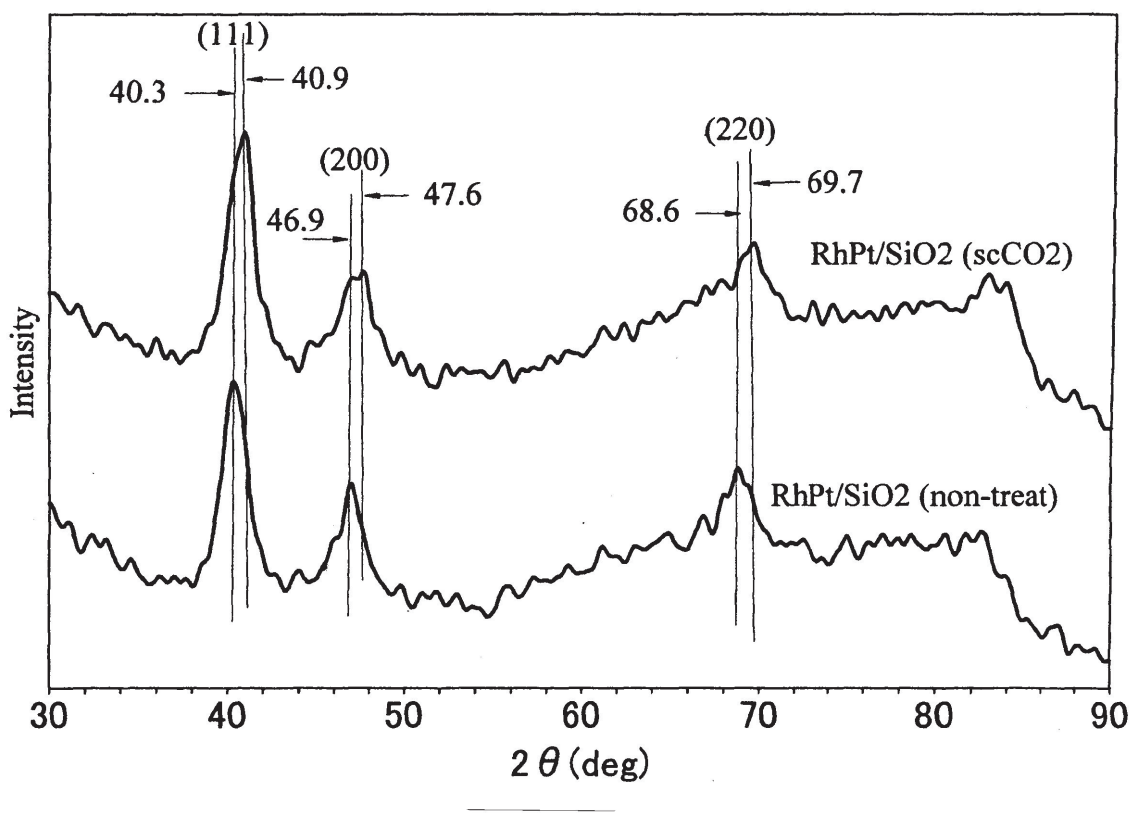

Figure 2s. XRD Patterns for RhPt/SiO<sub>2</sub> catalysts

Supplement: figs2.pdf [file figs2.pdf]

# Scheme 1s. 1,2-adsorbed mechanism for hydrogenolysis of butane

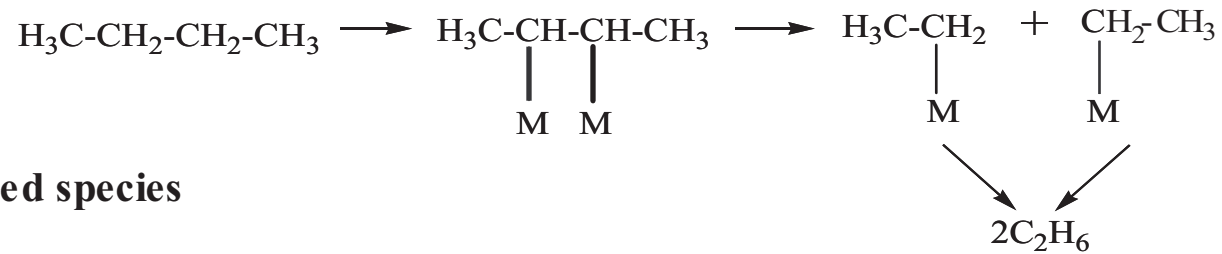

1,2-adsorbed species

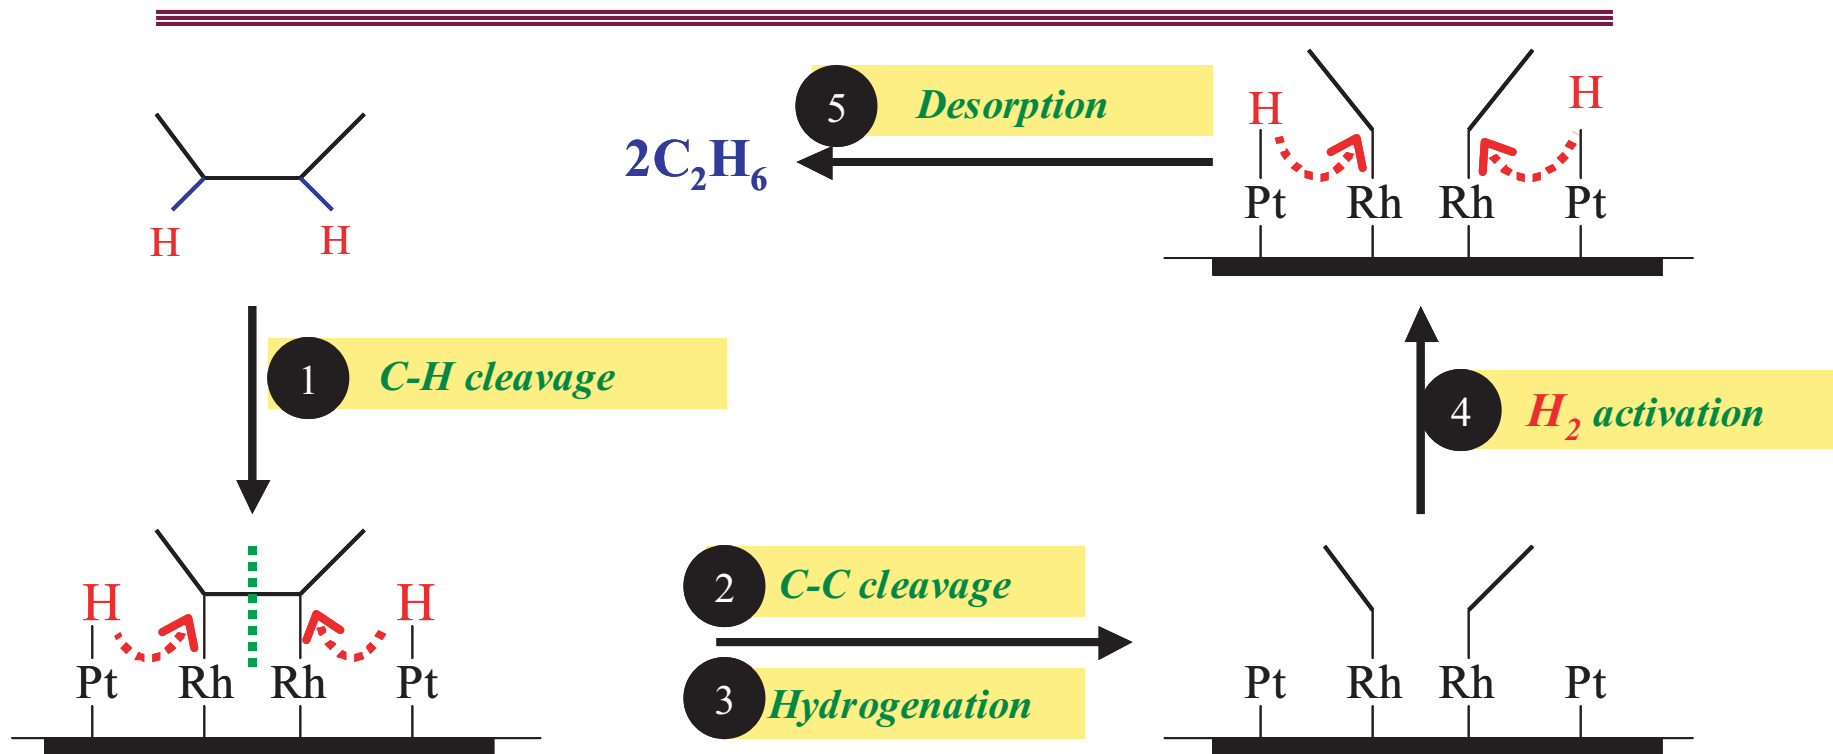

Supplement: schemes1.pdf [file schemes1.pdf]
